# Supplementary material for: Monitoring transient changes within overpressured regions of subduction zones using ambient seismic noise
Source: PubMed Central journal article supplement — Sci Adv. 2016 Jan 8;2(1):e1501289. doi: 10.1126/sciadv.1501289 (PMC4730859; doi:10.1126/sciadv.1501289), 2016-01-08
Supplement: 1501289_SM.pdf [file 1501289_SM.pdf]

## Supplementary Materials for

### Monitoring transient changes within overpressured regions of subduction zones using ambient seismic noise

Esteban J. Chaves and Susan Y. Schwartz

Published 8 January 2016, *Sci. Adv.* **2**, e1501289 (2016)

DOI: 10.1126/sciadv.1501289

#### The PDF file includes:

Fig. S1. Rayleigh wave velocity sensitivity kernels in our study region.

Fig. S2. Volumetric strain changes. (A to D) Volumetric strain changes generated by the  $M_w$  7.6 2012 Nicoya Peninsula earthquake at depths of (A) 0 km, (B) 5 km, (C) 10 km, and (D) 15 km calculated using the finite fault model provided by the United States Geological Survey

([http://earthquake.usgs.gov/earthquakes/eqinthenews/2012/usc000cfsd/finite\\_fault.php](http://earthquake.usgs.gov/earthquakes/eqinthenews/2012/usc000cfsd/finite_fault.php)) and Coulomb 3 software (31).

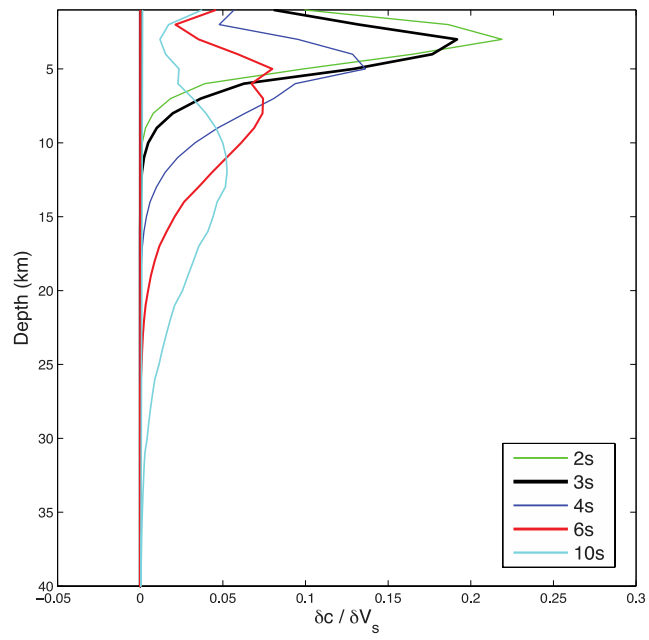

Fig. S1. Rayleigh wave velocity sensitivity kernels in our study region.

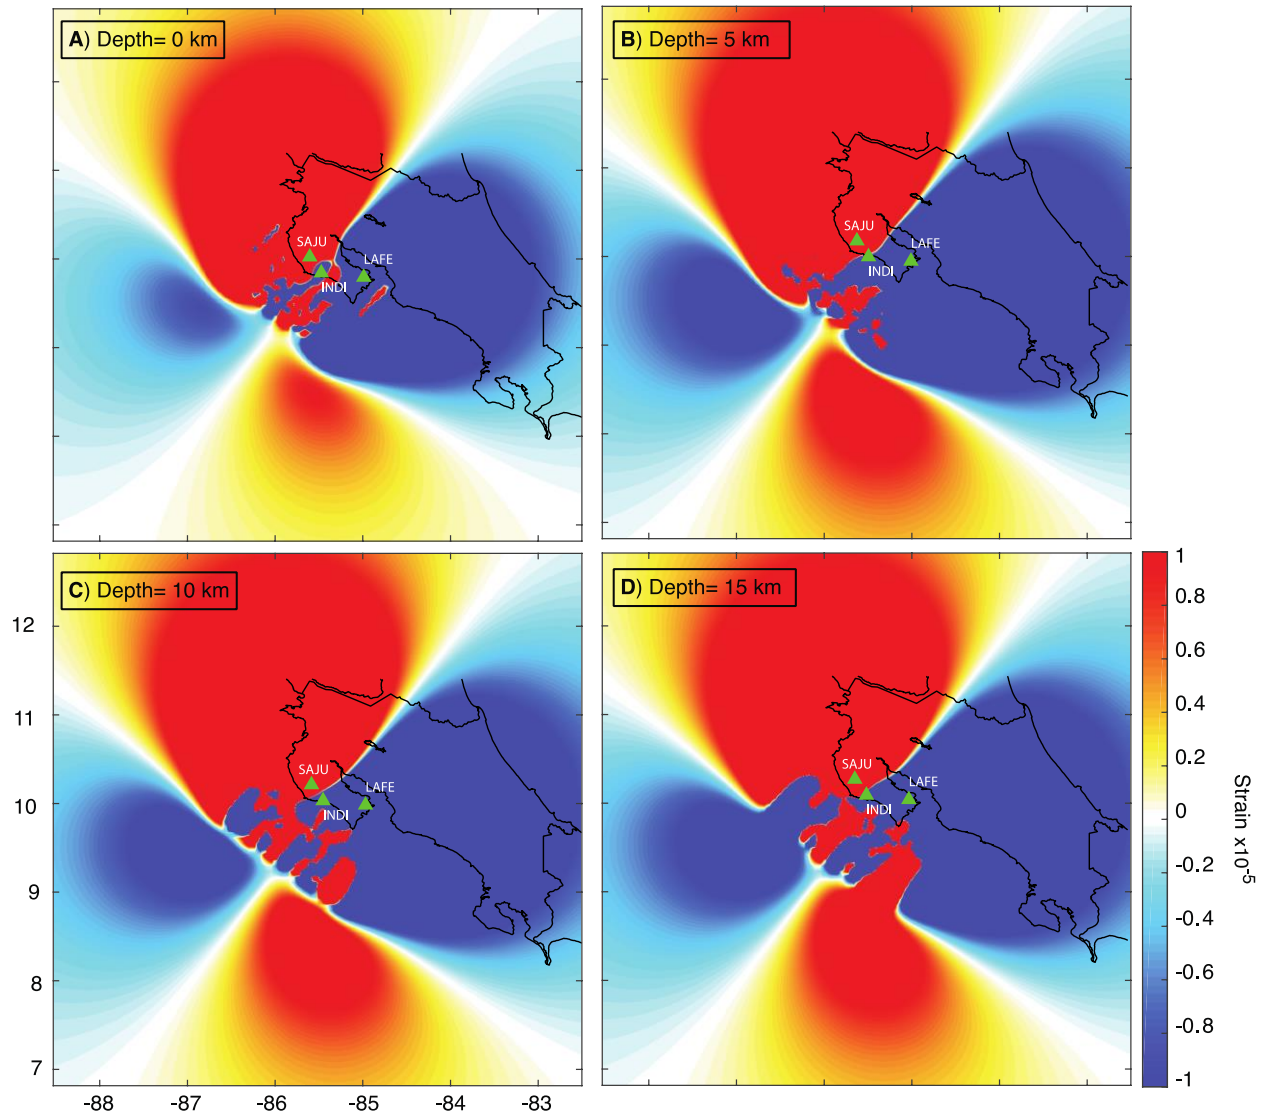

**Fig. S2.** Volumetric strain changes generated by the Mw 7.6 2012 Nicoya Peninsula earthquake at depths of **A)** 0 km, **B)** 5 km, **C)** 10 km and **D)** 15 km calculated using the finite fault model provided by the USGS ([http://earthquake.usgs.gov/earthquakes/eqinthenews/2012/usc000cfsd/finite\\_fault.php](http://earthquake.usgs.gov/earthquakes/eqinthenews/2012/usc000cfsd/finite_fault.php)) and Coulomb 3 software (31). Green triangles locate the seismic stations LAFE, INDI and SAJU.
